# Supplementary material for: Mineral Composition of Organically Grown Wheat Genotypes: Contribution to Daily Minerals Intake
Source: Int J Environ Res Public Health. 2010 Sep 6;7(9):3442–56. doi: 10.3390/ijerph7093442 (PMC2954555; doi:10.3390/ijerph7093442)
Supplement: Supplementary Table 1 [file ijerph-07-03442-s001.xls]

## Sheet: Supplementary Table 1
Mineral composition of wheat genotypes in organic farming system of Sweden.
Hussain, A. Larsson H., Kuktaite, R., Johansson, E.
Supplemtary Tabe 1: Location, Genotype name, Type and Genotype group
Serial Number	Prov #	Location	Genotype name	Type	Genotype group
1	1	Alnarp	T. Spelta bla	Winter	Spelt
2	2	Alnarp	Ax 4:1	Winter	Selection
3	3	Alnarp	Krachi gotland	Winter	Old cultivar
4	4	Alnarp	Ax 05	Winter	Selection
5	5	Alnarp	Vama	Winter	Old cultivar
6	6	Alnarp	Holger 2 1026/25	Winter	Old cultivar
7	7	Alnarp	6356	Winter	Landrace
8	8	Alnarp	Aros 1026/1	Winter	Old cultivar
9	10	Alnarp	LV gotland vit	Winter	Landrace
10	11	Alnarp	Ax/7	Winter	Selection
11	13	Alnarp	T. Polonicum	Winter	Primitive
12	14	Alnarp	Eroica 1026/4	Winter	Old cultivar
13	16	Alnarp	Ax 14 1027	Winter	Selection
14	21	Alnarp	Mirakel Ax	Winter	Primitive
15	22	Alnarp	Kippen Hauser	Winter	Spelt
16	23	Alnarp	6357 Klyon	Winter	Selection
17	26	Alnarp	15 Schweiz	Winter	Spelt
18	27	Alnarp	15 schweiz	Winter	Spelt
19	31	Alnarp	32 comp Ax	Winter	Selection
20	32	Alnarp	32 schweiz	Winter	Spelt
21	35	Alnarp	4496 Lv Gottland (a x 10)	Winter	Landrace
22	36	Alnarp	4496 spelt	Winter	Landrace
23	38	Alnarp	5113 (rod 4)	Winter	Selection
24	39	Alnarp	5113 rad / Brun	Winter	Selection
25	39	Alnarp	5113 rad / Brun	Winter	Selection
26	40	Alnarp	5113 rad 4	Winter	Selection
27	41	Alnarp	5113 rod brun	Winter	Selection
28	43	Alnarp	6356	Winter	Landrace
29	43	Alnarp	6356	Winter	Landrace
30	43	Alnarp	6356	Winter	Landrace
31	43	Alnarp	6356	Winter	Landrace
32	44	Alnarp	6356	Winter	Landrace
33	45	Alnarp	6356 Spelt	Winter	Spelt
34	48	Alnarp	6357 Klyvn sp	Winter	Spelt
35	49	Alnarp	6357 10	Winter	Spelt
36	50	Alnarp	6357	Winter	Spelt
37	50	Alnarp	6357	Winter	Spelt
38	51	Alnarp	6357 24	Winter	Spelt
39	54	Alnarp	6357 blå	Winter	Spelt
40	56	Alnarp	6357 brun	Winter	Spelt
41	59	Alnarp	6357 vit	Winter	Spelt
42	61	Alnarp	6358 16A3	Winter	Landrace
43	63	Alnarp	6358 Brun rod	Winter	Landrace
44	64	Alnarp	6358 vit	Winter	Landrace
45	65	Alnarp	6692	Winter	Landrace
46	66	Alnarp	9 Schweiz	Winter	Spelt
47	67	Alnarp	A x 11 bruna	Winter	Selection
48	68	Alnarp	A x3	Winter	Selection
49	69	Alnarp	Agron	Winter	Cultivar
50	71	Alnarp	Albihn	Winter	Spelt
51	74	Alnarp	Armensk vete	Winter	Landrace
52	75	Alnarp	Aros	Winter	Old cultivar
53	77	Alnarp	Asita	Winter	Cultivar
54	78	Alnarp	Aura	Winter	Old cultivar
55	79	Alnarp	Aura lang	Winter	Old cultivar
56	80	Alnarp	Ax 9:1	Winter	Selection
57	81	Alnarp	Ax 11 1027	Winter	Selection
58	82	Alnarp	Ax 14	Winter	Selection
59	83	Alnarp	Ax 14	Winter	Selection
60	85	Alnarp	Ax 3	Winter	Selection
61	86	Alnarp	Ax 4:1 1027	Winter	Selection
62	88	Alnarp	Ax 4:2	Winter	Selection
63	93	Alnarp	Ax 4:2 brun	Winter	Selection
64	94	Alnarp	Ax 4:2 vit	Winter	Selection
65	95	Alnarp	Ax 7	Winter	Selection
66	97	Alnarp	Ax11	Winter	Selection
67	98	Alnarp	Ax-5	Winter	Selection
68	99	Alnarp	Ax5	Winter	Selection
69	100	Alnarp	Banco 1026/2	Winter	Old cultivar
70	101	Alnarp	Bore II (1026/3)	Winter	Old cultivar
71	103	Alnarp	Borst gotland max	Winter	Landrace
72	104	Alnarp	Borst vete gotland	Winter	Landrace
73	105	Alnarp	Borst vete gotland	Winter	Landrace
74	106	Alnarp	Browichs rod	Winter	Landrace
75	109	Alnarp	Capu	Winter	Cultivar
76	111	Alnarp	Durum	Winter	Primitive
77	112	Alnarp	Effrada	Winter	Cultivar
78	116	Alnarp	Erbe 1026/24	Winter	Old cultivar
79	117	Alnarp	Erbe brun	Winter	Old cultivar
80	120	Alnarp	Ertus	Winter	Old cultivar
81	121	Alnarp	Ertus 1026/ 5	Winter	Old cultivar
82	122	Alnarp	Extrem	Winter	Cultivar
83	123	Alnarp	Extrem	Winter	Cultivar
84	124	Alnarp	Gamme land v.lodde	Winter	Landrace
85	125	Alnarp	Gammel land	Winter	Landrace
86	126	Alnarp	Gammel land rod spelt	Winter	Landrace
87	127	Alnarp	Gammel land vete	Winter	Landrace
88	129	Alnarp	Golden 10	Winter	Spelt
89	130	Alnarp	Golden 10	Winter	Spelt
90	131	Alnarp	Golden Ax-10	Winter	Spelt
91	134	Alnarp	Hallandska	Winter	Landrace
92	135	Alnarp	Hansa	Winter	Old cultivar
93	137	Alnarp	Hansa Ax	Winter	Old cultivar
94	138	Alnarp	Hansa brun	Winter	Old cultivar
95	139	Alnarp	Hansa brun (1026/26)	Winter	Old cultivar
96	140	Alnarp	Hartmut spiess 1027	Winter	Cultivar
97	141	Alnarp	Hartmut spiess	Winter	Cultivar
98	142	Alnarp	Helge	Winter	Cultivar
99	145	Alnarp	Holger Brun	Winter	Old cultivar
100	146	Alnarp	Holger Brun	Winter	Old cultivar
101	146	Alnarp	Holger Brun	Winter	Old cultivar
102	148	Alnarp	Inntaler	Winter	Old cultivar
103	150	Alnarp	Inntaler	Winter	Old cultivar
104	150	Alnarp	Inntaler	Winter	Old cultivar
105	153	Alnarp	Inntaler 1027	Winter	Old cultivar
106	154	Alnarp	Jacoby 59 utan borst	Winter	Landrace
107	157	Alnarp	Jacoby max	Winter	Landrace
108	157	Alnarp	Jacoby max	Winter	Landrace
109	159	Alnarp	Jarl	Winter	Old cultivar
110	162	Alnarp	Kippen hauser vete	Winter	Selection
111	165	Alnarp	krachi 1026/18	Winter	Old cultivar
112	166	Alnarp	Krachi borst	Winter	Old cultivar
113	166	Alnarp	Krachi borst	Winter	Old cultivar
114	167	Alnarp	Krachi borst	Winter	Old cultivar
115	168	Alnarp	Krachi borst 3	Winter	Old cultivar
116	169	Alnarp	Krachi borst utan	Winter	Old cultivar
117	170	Alnarp	Krachi brun	Winter	Old cultivar
118	171	Alnarp	Krachi urval	Winter	Old cultivar
119	173	Alnarp	Krachi utan borst	Winter	Old cultivar
120	175	Alnarp	Krim	Winter	Old cultivar
121	176	Alnarp	Krim	Winter	Old cultivar
122	177	Alnarp	Krim langa	Winter	Old cultivar
123	180	Alnarp	Lv gotland 9:10	Winter	Landrace
124	182	Alnarp	LV halland	Winter	Landrace
125	183	Alnarp	Lv. Gotland I	Winter	Landrace
126	184	Alnarp	Lysh vede brun	Winter	Old cultivar
127	185	Alnarp	Lysh vede brun borst	Winter	Old cultivar
128	186	Alnarp	Lyshvede	Winter	Old cultivar
129	188	Alnarp	Mirakel vete	Winter	Primitive
130	190	Alnarp	Mumie vete	Winter	Primitive
131	191	Alnarp	Neueggen dinkel 10	Winter	Spelt
132	193	Alnarp	Neuegger 10	Winter	Spelt
133	194	Alnarp	Neuegger dinkel vete	Winter	Spelt
134	195	Alnarp	Neuegger dinkel vete 10	Winter	Selection
135	198	Alnarp	Odin	Winter	Old cultivar
136	204	Alnarp	Olympia	Winter	Landrace
137	206	Alnarp	Oster burgsdorfer	Winter	Spelt
138	207	Alnarp	Osterr Burgsd 5	Winter	Spelt
139	217	Alnarp	Rauweizen	Winter	Primitive
140	218	Alnarp	Rauweizen	Winter	Primitive
141	219	Alnarp	Rauweizen	Winter	Primitive
142	220	Alnarp	Robur	Winter	Old cultivar
143	221	Alnarp	Robur 1026/10	Winter	Old cultivar
144	223	Alnarp	Rosen3	Winter	Spelt
145	224	Alnarp	Rosens Ax	Winter	Spelt
146	226	Alnarp	Svale	Winter	Old cultivar
147	227	Alnarp	Schwaben korn	Winter	Spelt
148	228	Alnarp	Sol	Winter	Old cultivar
149	229	Alnarp	Sol 1026 /11	Winter	Old cultivar
150	230	Alnarp	Spelt Ustakket 1026/22	Winter	Spelt
151	231	Alnarp	Spelt ustakket 14 vete Ax	Winter	Selection
152	231	Alnarp	Spelt ustakket 14 vete Ax	Winter	Selection
153	234	Alnarp	Spelt blå Ax	Winter	Spelt
154	239	Alnarp	Spelt ladden gråsort	Winter	Spelt
155	240	Alnarp	Spelt låddengrå	Winter	Spelt
156	244	Alnarp	Spelt Ustakket	Winter	Spelt
157	247	Alnarp	Spelt ustakket 14 vete	Winter	Spelt
158	249	Alnarp	Starke	Winter	Old cultivar
159	250	Alnarp	Starke II 1026/ 12	Winter	Old cultivar
160	251	Alnarp	Stava	Winter	Cultivar
161	252	Alnarp	Sv 5113 1026/ 19	Winter	Selection
162	254	Alnarp	Svale	Winter	Old cultivar
163	261	Alnarp	T. Turgidum cst	Winter	Primitive
164	262	Alnarp	T. Vulgterr	Winter	Landrace
165	263	Alnarp	T. Vulgterr kort borst	Winter	Landrace
166	264	Alnarp	T. Vulgterr lang	Winter	Landrace
167	266	Alnarp	T.Timopheevii	Winter	Primitive
168	270	Alnarp	URE	Winter	Cultivar
169	271	Alnarp	Ure	Winter	Cultivar
170	272	Alnarp	URE Brun	Winter	Cultivar
171	275	Alnarp	Vakka	Winter	Old cultivar
172	276	Alnarp	Vakka	Winter	Old cultivar
173	282	Alnarp	Vama host	Winter	Old cultivar
174	284	Alnarp	Vama host lang	Winter	Old cultivar
175	286	Alnarp	Warmland	Winter	Landrace
176	287	Alnarp	Virtus 1026 / 14	Winter	Old cultivar
177	288	Alnarp	Virtus 2	Winter	Old cultivar
178	292	Alnarp	vit spelt 1026/27	Winter	Spelt
179	294	Alnarp	zanda 1026 / 21	Winter	Old cultivar
180	295	Alnarp	Zuzgen dinkel	Winter	Spelt
181	310	Alnarp	Eroica 1046/07 6	Winter	Old cultivar
182	313	Alnarp	Erbe 1040/05 72	Winter	Old cultivar
183	314	Alnarp	Vama host 1040/5 61	Winter	Old cultivar
184	319	Alnarp	Ax 4:2	Winter	Selection
185	320	Alnarp	Tysk spelt 1040/5 33	Winter	Spelt
186	322	Alnarp	Schwaben korn	Winter	Spelt
187	324	Alnarp	Spelt ustakket ladda	Winter	Spelt
188	328	Alnarp	T.monococcum 1033/04	Winter	Primitive
189	329	Gotland	40.Ostro	Winter	Spelt
190	332	Gotland	48. Olympia	Winter	Landrace
191	333	Gotland	35. 6356	Winter	Landrace
192	337	Gotland	15.6357	Winter	Spelt
193	338	Gotland	34.6356	Winter	Landrace
194	339	Gotland	45.Lantvete Gottland AX-9	Spring	Landrace
195	341	Gotland	6357 blå	Winter	Spelt
196	342	Gotland	Ruta 26 Dala imp	Spring	Landrace
197	344	Gotland	Lantvete Gotland Vit	Spring	Landrace
198	345	Gotland	Ruta 30 LV Gotland Spelt	Winter	Spelt
199	346	Gotland	Svart emmer -Gamla Sorter	Winter	Primitive
200	347	Gotland	Sol	Winter	Old cultivar
201	348	Gotland	Ertus	Winter	Old cultivar
202	349	Gotland	Jacoby borst	Winter	Landrace
203	350	Gotland	Virtus	Winter	Old cultivar
204	352	Gotland	Eroica	Winter	Old cultivar
205	353	Gotland	Aros	Winter	Old cultivar
206	355	Gotland	Banco	Winter	Old cultivar
207	356	Gotland	Starke	Winter	Old cultivar
208	357	Gotland	Robur	Winter	Old cultivar
209	358	Gotland	Bore	Winter	Old cultivar
210	359	Gotland	Jarl	Winter	Old cultivar
211	360	Gotland	Holger	Winter	Old cultivar
212	361	Gotland	Vit Spelt Alnarp	Winter	Spelt
213	362	Gotland	Fylgia	Spring	Old cultivar
214	363	Gotland	Algot	Spring	Old cultivar
215	364	Gotland	Atle	Spring	Old cultivar
216	365	Gotland	Atson	Spring	Old cultivar
217	366	Gotland	Peko	Spring	Old cultivar
218	367	Gotland	Rival	Spring	Old cultivar
219	368	Gotland	Pondus	Spring	Old cultivar
220	369	Gotland	Karn	Spring	Old cultivar
221	370	Gotland	Dalaurval	Spring	Landrace
222	371	Gotland	Progress	Spring	Old cultivar
223	372	Gotland	Svenno	Spring	Old cultivar
224	373	Gotland	Olands	Spring	Landrace
225	374	Gotland	Aurora	Spring	Old cultivar
226	375	Gotland	Våremmer	Spring	Primitive
227	376	Gotland	Olandspelts	Spring	Landrace
228	377	Gotland	Lv Gotland	Spring	Spelt
229	382	Gotland	Oland1	Spring	Landrace
230	383	Gotland	Oland 14	Spring	Landrace
231	385	Gotland	Oland 2	Spring	Landrace
232	393	Gotland	Oberkulmer	Winter	Spelt
233	394	Gotland	Lantvete Uppsala	Winter	Landrace
234	395	Gotland	Neuegger	Winter	Spelt
235	397	Gotland	Lantvete Halland	Winter	Landrace
236	398	Gotland	Schweiz	Winter	Spelt
237	399	Gotland	Rosens	Winter	Spelt
238	401	Gotland	Kippenhauser	Winter	Spelt
239	402	Gotland	Spelt vet Gotland	Winter	Spelt
240	403	Gotland	Golden	Winter	Spelt
241	404	Gotland	Erbe	Winter	Old cultivar
242	405	Gotland	Starke	Winter	Old cultivar
243	407	Gotland	Svale	Winter	Old cultivar
244	408	Gotland	Schwaben	Winter	Spelt
245	410	Gotland	6356	Winter	Landrace
246	411	Gotland	Zuzgen dinkel	Winter	Spelt
247	412	Gotland	Sol	Winter	Old cultivar
248	414	Gotland	Holger 2	Winter	Old cultivar
249	415	Gotland	Lant vet Gotland	Winter	Spelt
250	416	Gotland	Jacoby borst	Winter	Landrace
251	417	Gotland	Eroica	Winter	Old cultivar
252	418	Gotland	Hansa Brun	Winter	Old cultivar
253	419	Gotland	T.spelta brun hvid	Winter	Spelt
254	423	Gotland	Oland urval 10 long borst spelt	Spring	Spelt
255	425	Gotland	Lantvet Gotland 8	Spring	Spelt
256	426	Gotland	Lantvet gotland 9	Spring	Spelt
257	427	Gotland	Lant vet halland 1	Spring	Landrace
258	431	Gotland	Olands 5	Spring	Landrace
259	432	Gotland	Lantvete Gotlands borst 2	Spring	Spelt
260	435	Gotland	Olands 62	Spring	Landrace
261	437	Gotland	Aurore 2	Spring	Old cultivar
262	438	Gotland	Diamant Brun	Spring	Old cultivar
263	440	Gotland	Atle	Spring	Old cultivar
264	441	Gotland	Progress 1	Spring	Old cultivar
265	443	Gotland	Fylgia 93	Spring	Old cultivar
266	489	Gotland	Borst vete Gotland	Winter	Landrace
267	501	Gotland	Kultur Emmer	Winter	Primitive
268	502	Gotland	Rod Emmer	Winter	Primitive
269	503	Gotland	Ostro	Winter	Spelt
270	505	Gotland	Schweiz Spelt	Winter	Spelt
271	507	Gotland	Vit Emmer	Winter	Primitive
272	509	Gotland	Vit Spelt	Winter	Spelt
273	510	Gotland	Svart emmer	Winter	Primitive
274	513	Gotland	Lant vete Gotland 1	Spring	Spelt
275	514	Gotland	Enkorn	Winter	Primitive
276	516	Gotland	Kippen Hauser	Winter	Spelt
277	521	Gotland	Spelt vete gotland	Winter	Spelt
278	523	Gotland	Folke	Winter	Cultivar
279	523	Gotland	Folke	Winter	Cultivar
280	525	Gotland	Jarl	Winter	Old cultivar
281	526	Gotland	Lantvete Gotland vit	Winter	Spelt
282	528	Gotland	6356	Winter	Landrace
283	529	Gotland	Peter Jacoby	Winter	Landrace
284	531	Gotland	Bore	Winter	Old cultivar
285	532	Gotland	Borst vete Gotland	Winter	Landrace
286	534	Gotland	Olympia	Winter	Landrace
287	536	Gotland	Borst vete gotland	Winter	Landrace
288	539	Gotland	Browichs	Winter	Old cultivar
289	546	Gotland	Olympia	Winter	Landrace
290	547	Gotland	Enkorn	Winter	Primitive
291	549	Gotland	P3 svart emmer	Winter	Primitive
292	550	Gotland	NI-enkorn	Winter	Primitive
293	561	Gotland	Albihn	Winter	Spelt
294	564	Gotland	11.Armensk6	Winter	Old cultivar
295	570	Gotland	31. Kamut Platt	Winter	Primitive
296	573	Gotland	17. 6357 vit	Winter	Spelt
297	576	Gotland	28. T.dicoccum emmer	Winter	Primitive
298	583	Gotland	Jacoby max	Winter	Landrace
299	587	Gotland	Vit spelt	Winter	Spelt
300	588	Gotland	Kippen hauser	Winter	Spelt
301	589	Gotland	Zuzgen dinkel	Winter	Spelt
302	590	Gotland	Osterreicher burgsddorf	Winter	Spelt
303	593	Gotland	6357 brun	Winter	Spelt
304	598	Gotland	T.monococcum tina	Winter	Primitive
305	600	Gotland	Rod Emmer	Winter	Primitive
306	601	Gotland	Spelt vete gotland	Winter	Spelt
307	602	Gotland	Lantvete gotland I	Spring	Spelt
308	604	Gotland	Ruta 11 lantvete dal	Spring	Landrace
309	606	Alnarp	Olands 17 borst spelt	Spring	Spelt
310	607	Alnarp	Koga I	Spring	Old cultivar
311	608	Alnarp	Lv. Gotland 6 borst	Spring	Spelt
312	609	Alnarp	Atle 3007	Spring	Old cultivar
313	629	Alnarp	Lv. Halland I	Spring	Landrace
314	630	Alnarp	Fylgia 9	Spring	Old cultivar
315	631	Alnarp	Algot	Spring	Old cultivar
316	634	Alnarp	Dala 2	Spring	Landrace
317	636	Alnarp	Walter brun	Spring	Old cultivar
318	637	Alnarp	Reno	Spring	Cultivar
319	638	Alnarp	Svenno	Spring	Old cultivar
320	639	Alnarp	Pondus 2	Spring	Old cultivar
321	640	Alnarp	Aurore 1	Spring	Old cultivar
322	641	Alnarp	Atle 1	Spring	Old cultivar
323	642	Alnarp	Lv. Dal 15 vit borst	Spring	Landrace
324	644	Alnarp	Lv. dal 16 vit borst	Spring	Landrace
325	646	Alnarp	Runar	Spring	Cultivar
326	647	Alnarp	Peko 99	Spring	Old cultivar
327	650	Alnarp	Lv. Dal 16 vit	Spring	Landrace
328	651	Alnarp	Rollo	Spring	Cultivar
329	652	Alnarp	Runar brun	Spring	Old cultivar
330	653	Alnarp	APU	Spring	Old cultivar
331	655	Alnarp	Sappo	Spring	Old cultivar
332	656	Alnarp	Lv. Halland 2	Spring	Landrace
333	657	Alnarp	Karn 1	Spring	Old cultivar
334	660	Alnarp	Fylgia 2	Spring	Old cultivar
335	661	Alnarp	Möystad	Spring	Old cultivar
336	665	Alnarp	Dala 2	Spring	Landrace
337	668	Alnarp	Svenno np	Spring	Old cultivar
338	671	Alnarp	Svenno 1	Spring	Old cultivar
339	672	Alnarp	Rival 1	Spring	Old cultivar
340	674	Alnarp	fylgia 1	Spring	Old cultivar
341	675	Alnarp	Dala 1	Spring	Landrace
342	677	Alnarp	T. dicoccum kort	Spring	Primitive
343	680	Alnarp	Atle 4	Spring	Old cultivar
344	681	Alnarp	Lv. Dal vit borst	Spring	Landrace
345	682	Alnarp	Reno	Spring	Cultivar
346	683	Alnarp	Progress 2	Spring	Old cultivar
347	686	Alnarp	Kenya	Spring	Old cultivar
348	687	Alnarp	Red fite 2	Spring	Old cultivar
349	688	Alnarp	Atson 1	Spring	Old cultivar
350	692	Alnarp	Olands urval 10 borst spelt	Spring	Spelt
351	693	Alnarp	Urval olands 1 brun borst	Spring	Landrace
352	694	Alnarp	Rival 2	Spring	Old cultivar
353	695	Alnarp	Utrecht blue	Spring	Primitive
354	696	Alnarp	olands 10 borst spelt kort	Spring	Spelt
355	697	Alnarp	Dala 16 brun 2	Spring	Landrace
356	698	Alnarp	Red fite	Spring	Old cultivar
357	700	Alnarp	Aurore 2	Spring	Old cultivar
358	702	Alnarp	Lv. Gotland 6	Spring	Spelt
359	703	Alnarp	Lv. Gotland II	Spring	Spelt
360	705	Alnarp	Olands 17 borst spelt	Spring	Spelt
361	706	Alnarp	Lv. Dal 16 vit	Spring	Landrace
362	708	Alnarp	Diamant kort 2	Spring	Old cultivar
363	709	Alnarp	T. boeoticum	Spring	Primitive
364	711	Alnarp	Rival 1	Spring	Old cultivar
365	712	Alnarp	Lv. Halland I	Spring	Landrace
366	715	Alnarp	Fylgia I	Spring	Old cultivar
367	717	Alnarp	peko vitborst	Spring	Old cultivar
368	718	Alnarp	Oland 5	Spring	Landrace
369	719	Alnarp	Lv. Dal 16 brun borst I	Spring	Landrace
370	720	Alnarp	Lv. Gotland 8	Spring	Spelt
371	721	Alnarp	Ostby 2	Spring	Old cultivar
372	722	Alnarp	Lv. Gotland 6 borst 1	Spring	Spelt
373	723	Alnarp	Olands urval 7	Spring	Landrace
374	724	Alnarp	Olands 6 I	Spring	Landrace
375	725	Alnarp	APU borst	Spring	Old cultivar
376	727	Alnarp	Lv. Gotland 2	Spring	Spelt
377	732	Alnarp	Olands urval spelt	Spring	Spelt
378	733	Alnarp	Rollo	Spring	Cultivar
379	734	Alnarp	Kolben	Spring	Old cultivar
380	735	Alnarp	Lv. Gotland borst 1	Spring	Spelt
381	736	Alnarp	Lv. Halland I brun	Spring	Landrace
382	741	Alnarp	Touko	Spring	Old cultivar
383	744	Bohus Lant	Stava	Winter	Cultivar
384	745	Bohus Lant	Jarl	Winter	Old cultivar
385	746	Bohus Lant	Brun spelt	Winter	Spelt
386	747	Bohus Lant	B 13867 spelt	Winter	Spelt
387	748	Bohus Lant	Intaler tress	Winter	Old cultivar
388	749	Bohus Lant	Pansar III	Winter	Old cultivar
389	750	Bohus Lant	Jacoby borst	Winter	Landrace
390	751	Bohus Lant	Banco	Winter	Old cultivar
391	752	Bohus Lant	Hansa brun	Winter	Old cultivar
392	753	Bohus Lant	Holger	Winter	Old cultivar
393	754	Bohus Lant	Jacoby urval	Winter	Landrace
394	755	Bohus Lant	Hansa	Winter	Old cultivar
395	756	Bohus Lant	Aros	Winter	Old cultivar
396	757	Bohus Lant	Olivin	Winter	Cultivar
397	758	Bohus Lant	Vit spelt	Winter	Spelt
398	759	Bohus Lant	Vit spelt	Winter	Spelt
399	760	Bohus Lant	Hansa brun	Winter	Old cultivar
400	761	Bohus Lant	Aros	Winter	Old cultivar
401	762	Bohus Lant	Holger	Winter	Old cultivar
402	763	Bohus Lant	Pansar III	Winter	Old cultivar
403	764	Bohus Lant	Jacoby borst	Winter	Landrace
404	765	Bohus Lant	Intaler tress	Winter	Old cultivar
405	766	Bohus Lant	stava	Winter	Cultivar
406	767	Bohus Lant	Olivin	Winter	Cultivar
407	768	Bohus Lant	Jacoby urval	Winter	Landrace
408	769	Bohus Lant	Banco	Winter	Old cultivar
409	770	Bohus Lant	B 13867 spelt	Winter	Spelt
410	771	Bohus Lant	Brun spelt	Winter	Spelt
411	772	Bohus Lant	Hansa	Winter	Old cultivar
412	773	Gotland	Lantvete gotland borst 7/5	Spring	Spelt
413	774	Gotland	Lantvete gotland borst 2	Spring	Spelt
414	775	Gotland	Lantvete gotland borst 1	Spring	Spelt
415	776	Gotland	Lantvete gotland 6 borst	Spring	Spelt
416	777	Gotland	Lantvete gotland borst 1 spelt typ	Spring	Spelt
417	779	Gotland	Lantvete gotland 1 vete	Spring	Spelt
418	780	Gotland	Oland 62	Spring	Landrace
419	781	Gotland	Olands 13 vete	Spring	Landrace
420	784	Gotland	Olands 18 falt sammet	Spring	Landrace
421	785	Gotland	Spelt vete gotland	Winter	Spelt
422	786	Gotland	6356	Winter	Landrace
423	787	Gotland	6356 spelt	Winter	Spelt
424	788	Gotland	Olands 61	Spring	Landrace
425	789	Gotland	Olands 5	Spring	Landrace
426	790	Gotland	Lantvete gotland 4 vete	Spring	Spelt
427	791	Gotland	Olands 16	Spring	Landrace
428	792	Gotland	Enkorn	Winter	Primitive
429	793	Gotland	Svart emmer	Winter	Primitive
430	794	Gotland	Rod Emmer	Winter	Primitive
431	795	Gotland	Enkorn	Winter	Primitive
432	796	Uppsala	Fylgia 93	Spring	Old cultivar
433	797	Uppsala	Lv dal 10 brun	Spring	Landrace
434	798	Uppsala	Algot	Spring	Old cultivar
435	799	Uppsala	Lv Dal 1	Spring	Landrace
436	800	Uppsala	Atle 1	Spring	Old cultivar
437	801	Uppsala	Atle 2	Spring	Old cultivar
438	802	Uppsala	Lv. Halland alnarp	Spring	Landrace
439	803	Uppsala	Lv. Halland ekhaga	Spring	Landrace
440	804	Uppsala	APU	Spring	Old cultivar
441	805	Uppsala	Pondus	Spring	Old cultivar
442	806	Uppsala	Atle 3	Spring	Old cultivar
443	807	Uppsala	Atson 99	Spring	Old cultivar
444	808	Uppsala	Progress 2	Spring	Old cultivar
445	809	Uppsala	Red fite	Spring	Old cultivar
446	810	Uppsala	Ring	Spring	Cultivar
447	811	Uppsala	Diamant brun 2	Spring	Old cultivar
448	812	Uppsala	Aurore 1	Spring	Old cultivar
449	813	Uppsala	Fram	Spring	Old cultivar
450	814	Uppsala	Vinjett	Spring	Cultivar
451	815	Uppsala	Olands 13	Spring	Landrace
452	816	Uppsala	Ås	Spring	Old cultivar
453	817	Uppsala	William	Spring	Cultivar
454	818	Uppsala	Svenno upp	Spring	Old cultivar
455	819	Uppsala	Lv. Dal 15 vit borst	Spring	Landrace
456	820	Uppsala	Ella	Spring	Cultivar
457	821	Uppsala	Svenno	Spring	Old cultivar
458	822	Uppsala	Fylgia 2	Spring	Old cultivar
459	823	Uppsala	Ex kolben	Spring	Old cultivar
460	824	Uppsala	Lv. Dal 16 vit borst	Spring	Landrace
461	825	Uppsala	Karn 1	Spring	Old cultivar
462	826	Uppsala	Lv.dal vit borst	Spring	Landrace
463	827	Uppsala	Svenno 2	Spring	Old cultivar
464	828	Uppsala	Pondus 2	Spring	Old cultivar
465	829	Uppsala	Kärn 2	Spring	Old cultivar
466	830	Uppsala	Sappo	Spring	Old cultivar
467	831	Uppsala	Olands I borst	Spring	Landrace
468	833	Alnarp	Rival	Spring	Old cultivar
469	834	Alnarp	Atson	Spring	Old cultivar
470	835	Alnarp	Diamant brun	Spring	Old cultivar
471	836	Alnarp	APU	Spring	Old cultivar
472	837	Alnarp	Aurore	Spring	Old cultivar
473	838	Alnarp	Progress	Spring	Old cultivar
474	839	Alnarp	Lv. Dal 15	Spring	Landrace
475	842	Alnarp	Ur olands 8	Spring	Landrace
476	843	Alnarp	Lv dal 16	Spring	Landrace
477	844	Alnarp	Fylgia röd	Spring	Old cultivar
478	845	Alnarp	Peko borst	Spring	Old cultivar
479	847	Alnarp	Ex kolben	Spring	Old cultivar
480	848	Alnarp	Algot	Spring	Old cultivar
481	849	Alnarp	Diamant vit	Spring	Old cultivar
482	850	Alnarp	Dala Urval	Spring	Landrace
483	851	Alnarp	Oland I utan borst	Spring	Landrace
484	852	Uppsala	Russhvede	Winter	Landrace
485	853	Uppsala	Banco long	Winter	Old cultivar
486	854	Uppsala	Svale	Winter	Old cultivar
487	855	Uppsala	Walde	Winter	Old cultivar
488	857	Uppsala	Aura long	Winter	Old cultivar
489	858	Uppsala	Erbe	Winter	Old cultivar
490	859	Uppsala	Robur	Winter	Old cultivar
491	860	Uppsala	Banco	Winter	Old cultivar
492	861	Uppsala	Red prolific	Winter	Old cultivar
493	328-	Gotland	39.Ostar	Winter	Spelt
